# Supplementary material
Source: HighWire-hosted journal article supplement (https://jmg.bmj.com/content/jmedgenet-2019-106111)
Supplement: inline-supplementary-material-2 [file inline-supplementary-material-2.docx]

**Supplementary Materials and Methods**

*Study Selection*

PubMed searches using key search terms or phrases such as “whole genome sequencing AND pediatric AND undiagnosed” or “Next generation sequencing AND rare disease AND pediatric” were conducted between January 2017 and November 2018. A total of 2,146 titles and abstracts were identified and subsequently screened for inclusion. Of these, 2,117 did not meet inclusion criteria (e.g., major focus on oncology applications, study population > 18 years, article in a foreign language, no outcome or treatment measures reported) and were thus excluded. An additional seven publications identified from a manual search in the reference list of the retrieved articles were included, resulting in a total of 36 included publications.


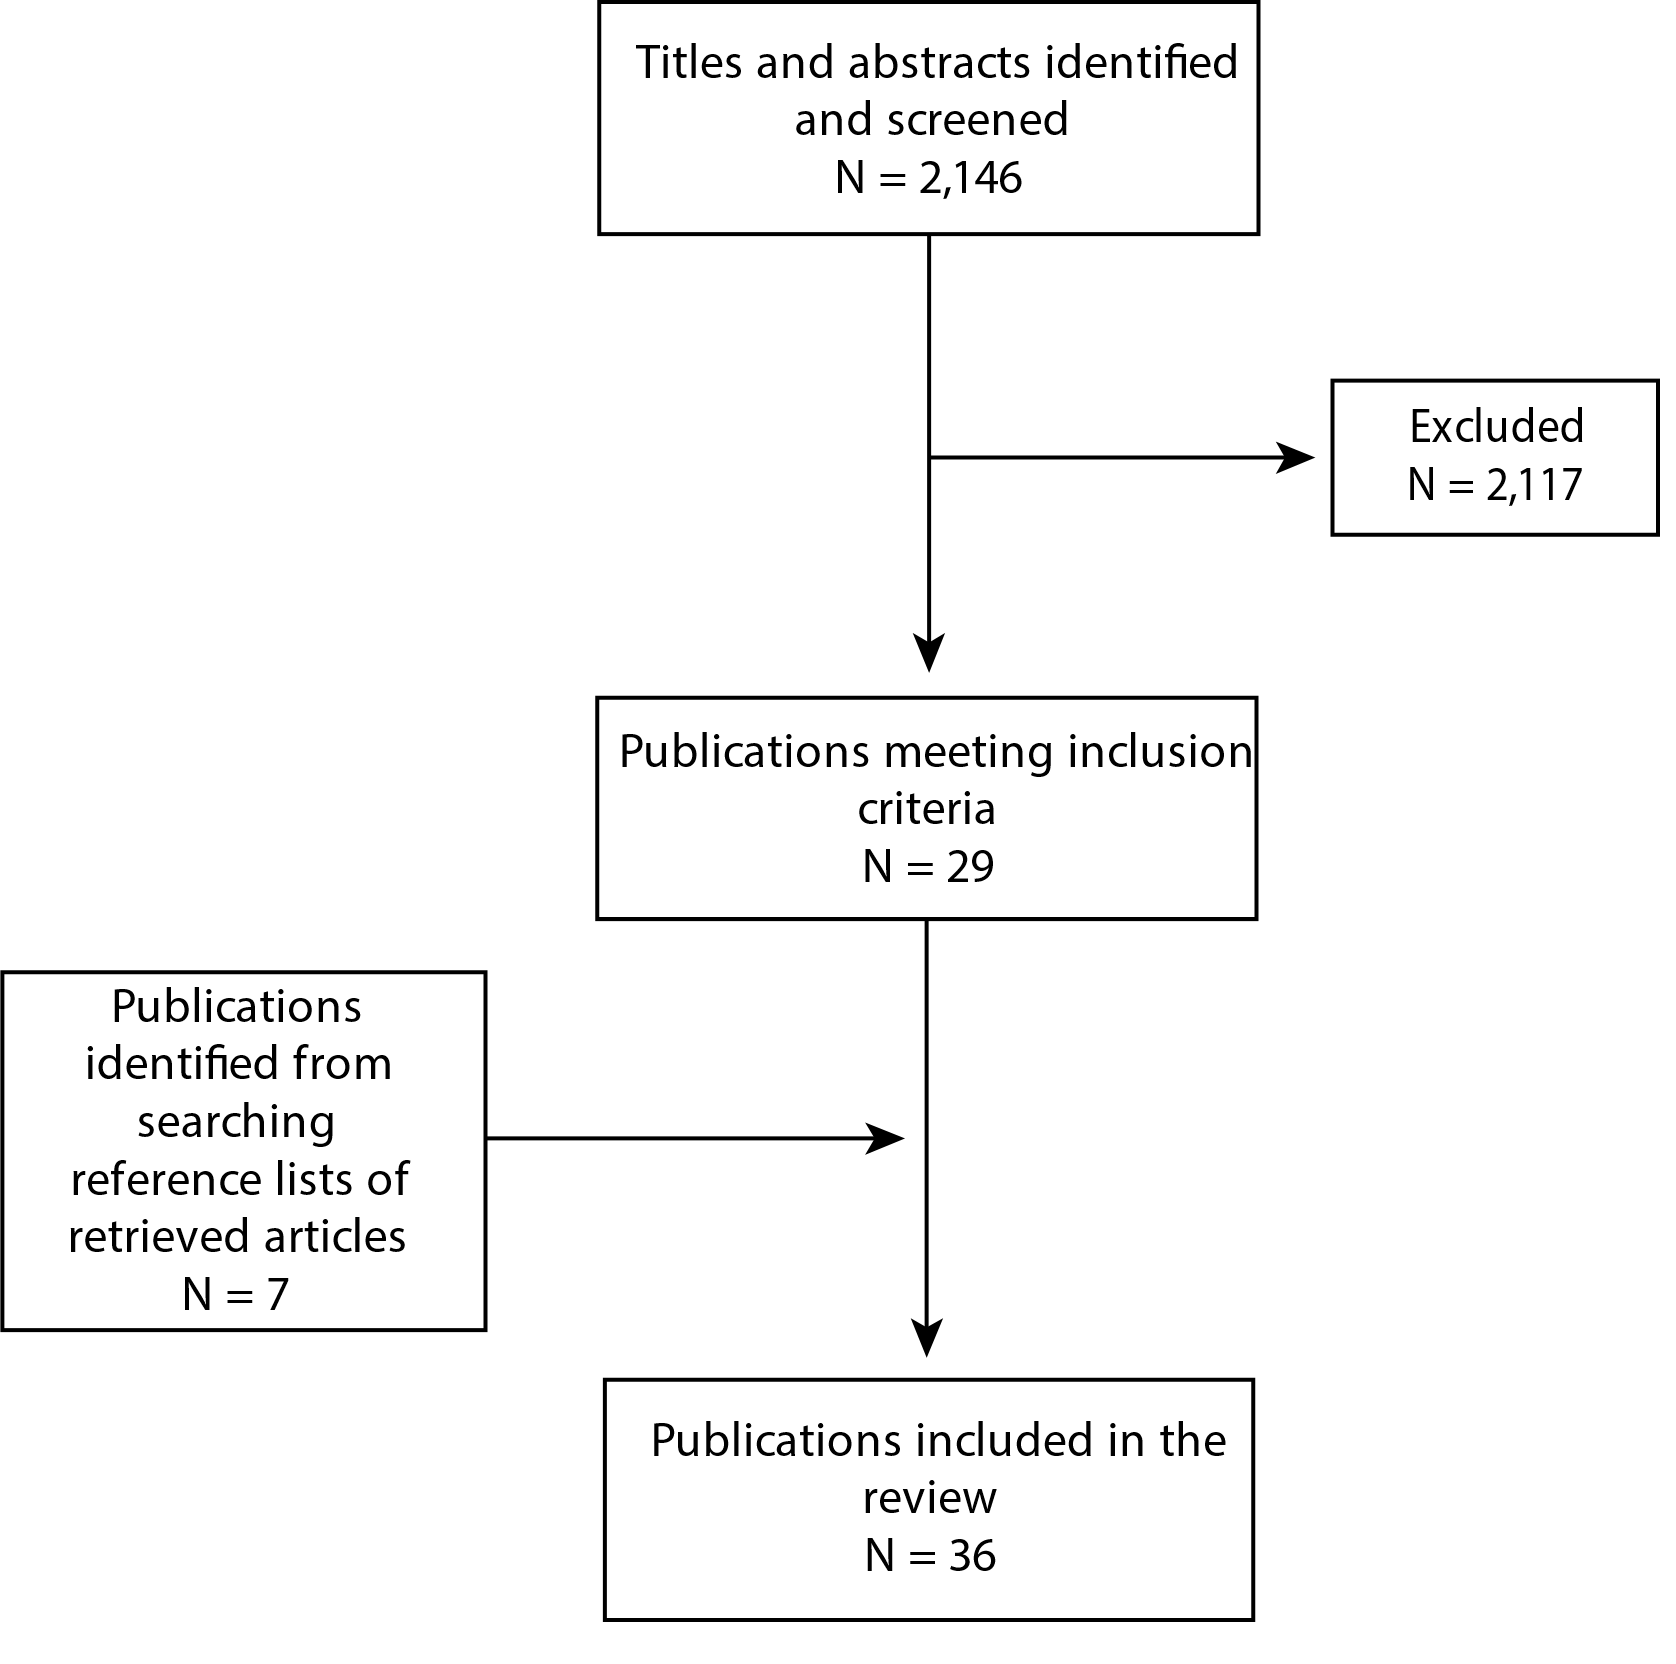


**Summary of 36 Studies Meeting Inclusion Criteria**

| Citation | Publication Type | Test(s) | Population |
| --- | --- | --- | --- |
| Bick et al. 20171 | Primary research | GS | Children with suspected Mendelian disorder |
| Bowling et al. 20172 | Primary research | GS, ES | Children with ID and/or DD |
| Clark et al. 20183 | Meta-analysis | GS, ES | Children with suspected genetic diseases |
| Coulter et al. 20114 | Primary research | CMA | Pediatric patients with DD/ID, ASD and congenital anomalies |
| Farnaes et al. 20185 | Primary research | R-GS | Children (inpatient) less than 1 yr old |
| Gilissen et al. 20146 | Primary research | GS | Children with severe ID |
| Hayeems et al. 20177 | Primary research (economic) | GS, CMA | Children with DD over one year old |
| Howell et al. 20138 | Primary research | CMA | Children with neurological conditions of unknown etiology |
| Howell et al. 20189 | Primary research (economic) | ES | Infants with severe epilepsies of infancy |
| Joshi et al. 201610 | Primary research (economic) | ES | Children with early onset epileptic encephalopathy |
| Kuperberg et al. 201611 | Primary research | ES | Pediatric patients suspected of having a monogenic disorder but remained undiagnosed after extensive testing |
| Lee et al. 201412 | Primary research | ES | Patients with undiagnosed, suspected genetic conditions |
| Lee et al. 201813 | Primary research | CMA | Children with DD or ID |
| Lionel et al. 201714 | Primary research | GS, standard testing | Children with a clinical phenotype suggestive of an underlying genetic disorder |
| Meienberg et al. 201615 | Primary research | GS, ES | Five unrelated females |
| Miller et al. 201516 | Primary research | R-GS | Critically ill infants with suspected genetic disorder |
| Petrikin et al. 201517 | Review | R-GS | Critically ill neonates |
| Petrikin et al. 201818 | Primary research | R-GS | NICU or PICU infants with illness of unknown etiology |
| Retterer et al. 201519 | Primary research | ES | Children and adults with various clinical presentations |
| Saunders et al. 201220 | Primary research | R-GS | Infants presenting without a molecular diagnosis, suspected genetic etiology |
| Soden et al. 201421 | Primary research | GS, ES | Children with NDD |
| Splinter et al. 201822 | Primary research | Any | Children and adults with undiagnosed conditions |
| Stark et al. 201623 | Primary research | ES | Infants with multiple congenital abnormalities and dysmorphic features; suspected monogenic disease |
| Stavropoulos et al. 201624 | Primary research | GS | Children less than 18 yrs old with than two structural malformations; DD of unknown etiology |
| Tammimies et al. 201525 | Primary resarch | CMA, ES | Children with ASD |
| Tan et al. 201726 | Primary research | ES | Children older than 2 yrs with a suspected monogenic disorder |
| Tarailo-Graovac et al. 201627 | Primary research | ES | Children with ID and neurometabolic disorder of unknown etiology |
| Taylor et al. 201528 | Primary research | GS | Broad spectrum of patients with Mendelian and immunological disorders |
| Theunissen et al. 201829 | Primary research | ES | Children in whom mitochondrial genetic cause is suspected |
| Thevenon et al. 201630 | Primary research | ES | Undiagnosed patients with severe ID and epileptic encephalopathy |
| Tsiplova et al. 201731 | Primary research (economic) | GS | Patients with ASD |
| van Diemen et al. 201732 | Primary research | R-GS | Critically ill newborns |
| Vissers et al. 201733 | Primary research | ES, standard genetic testing | Children with neurological symptoms of suspected genetic origin |
| Willig et al. 201534 | Primary research | GS | Infants with suspected genetic disorders, level 4 NICU and PICU |
| Wright et al. 201535 | Primary research | ES | Children with ID, DD, ASD, hearing impairment, CHD, seizures |
| Wright et al. 201836 | Review | GS, ES, TGP | Children with rare diseases with underlying genetic condition |

GS: genome sequencing; ES: exome sequencing; TGP: targeted gene panel; ID: intellectual disability; DD: developmental delay; ASD: Autism Spectrum Disorder; CHD: congenital heart defect; NDD: neurodevelopmental disorder.

**References**

1. Bick D, Fraser PC, Gutzeit MF, Harris JM, Hambuch TM, Helbling DC, Jacob HJ, Kersten JN, Leuthner SR, May T, North PE, Prisco SZ, Schuler BA, Shimoyama M, Strong KA, Van Why SK, Veith R, Verbsky J, Weborg AM, Jr., Wilk BM, Willoughby RE, Jr., Worthey EA, Dimmock DP. Successful Application of Whole Genome Sequencing in a Medical Genetics Clinic. *J Pediatr Genet* 2017;6(2):61-76. doi: 10.1055/s-0036-1593968 [published Online First: 2017/05/13]

2. Bowling KM, Thompson ML, Amaral MD, Finnila CR, Hiatt SM, Engel KL, Cochran JN, Brothers KB, East KM, Gray DE, Kelley WV, Lamb NE, Lose EJ, Rich CA, Simmons S, Whittle JS, Weaver BT, Nesmith AS, Myers RM, Barsh GS, Bebin EM, Cooper GM. Genomic diagnosis for children with intellectual disability and/or developmental delay. *Genome Med* 2017;9(1):43. doi: 10.1186/s13073-017-0433-1 [published Online First: 2017/05/31]

3. Clark MM, Stark Z, Farnaes L, Tan TY, White SM, Dimmock D, Kingsmore SF. Meta-analysis of the diagnostic and clinical utility of genome and exome sequencing and chromosomal microarray in children with suspected genetic diseases. *NPJ Genom Med* 2018;3:16. doi: 10.1038/s41525-018-0053-8 [published Online First: 2018/07/14]

4. Coulter ME, Miller DT, Harris DJ, Hawley P, Picker J, Roberts AE, Sobeih MM, Irons M. Chromosomal microarray testing influences medical management. *Genet Med* 2011;13(9):770-6. doi: 10.1097/GIM.0b013e31821dd54a [published Online First: 2011/07/01]

5. Farnaes L, Hildreth A, Sweeney NM, Clark MM, Chowdhury S, Nahas S, Cakici JA, Benson W, Kaplan RH, Kronick R, Bainbridge MN, Friedman J, Gold JJ, Ding Y, Veeraraghavan N, Dimmock D, Kingsmore SF. Rapid whole-genome sequencing decreases infant morbidity and cost of hospitalization. *NPJ Genom Med* 2018;3:10. doi: 10.1038/s41525-018-0049-4 [published Online First: 2018/04/13]

6. Gilissen C, Hehir-Kwa JY, Thung DT, van de Vorst M, van Bon BW, Willemsen MH, Kwint M, Janssen IM, Hoischen A, Schenck A, Leach R, Klein R, Tearle R, Bo T, Pfundt R, Yntema HG, de Vries BB, Kleefstra T, Brunner HG, Vissers LE, Veltman JA. Genome sequencing identifies major causes of severe intellectual disability. *Nature* 2014;511(7509):344-7. doi: 10.1038/nature13394 [published Online First: 2014/06/05]

7. Hayeems RZ, Bhawra J, Tsiplova K, Meyn MS, Monfared N, Bowdin S, Stavropoulos DJ, Marshall CR, Basran R, Shuman C, Ito S, Cohn I, Hum C, Girdea M, Brudno M, Cohn RD, Scherer SW, Ungar WJ. Care and cost consequences of pediatric whole genome sequencing compared to chromosome microarray. *Eur J Hum Genet* 2017;25(12):1303-12. doi: 10.1038/s41431-017-0020-3 [published Online First: 2017/11/22]

8. Howell KB, Kornberg AJ, Harvey AS, Ryan MM, Mackay MT, Freeman JL, Rodriguez Casero MV, Collins KJ, Hayman M, Mohamed A, Ware TL, Clark D, Bruno DL, Burgess T, Slater H, McGillivray G, Leventer RJ. High resolution chromosomal microarray in undiagnosed neurological disorders. *J Paediatr Child Health* 2013;49(9):716-24. doi: 10.1111/jpc.12256 [published Online First: 2013/06/05]

9. Howell KB, Eggers S, Dalziel K, Riseley J, Mandelstam S, Myers CT, McMahon JM, Schneider A, Carvill GL, Mefford HC, Scheffer IE, Harvey AS. A population-based cost-effectiveness study of early genetic testing in severe epilepsies of infancy. *Epilepsia* 2018;59(6):1177-87. doi: 10.1111/epi.14087 [published Online First: 2018/05/12]

10. Joshi C, Kolbe DL, Mansilla MA, Mason SO, Smith RJ, Campbell CA. Reducing the Cost of the Diagnostic Odyssey in Early Onset Epileptic Encephalopathies. *Biomed Res Int* 2016;2016:6421039. doi: 10.1155/2016/6421039 [published Online First: 2016/06/01]

11. Kuperberg M, Lev D, Blumkin L, Zerem A, Ginsberg M, Linder I, Carmi N, Kivity S, Lerman-Sagie T, Leshinsky-Silver E. Utility of Whole Exome Sequencing for Genetic Diagnosis of Previously Undiagnosed Pediatric Neurology Patients. *J Child Neurol* 2016;31(14):1534-39. doi: 10.1177/0883073816664836 [published Online First: 2016/08/31]

12. Lee H, Deignan JL, Dorrani N, Strom SP, Kantarci S, Quintero-Rivera F, Das K, Toy T, Harry B, Yourshaw M, Fox M, Fogel BL, Martinez-Agosto JA, Wong DA, Chang VY, Shieh PB, Palmer CG, Dipple KM, Grody WW, Vilain E, Nelson SF. Clinical exome sequencing for genetic identification of rare Mendelian disorders. *Jama* 2014;312(18):1880-7. doi: 10.1001/jama.2014.14604 [published Online First: 2014/10/19]

13. Lee JS, Hwang H, Kim SY, Kim KJ, Choi JS, Woo MJ, Choi YM, Jun JK, Lim BC, Chae JH. Chromosomal Microarray With Clinical Diagnostic Utility in Children With Developmental Delay or Intellectual Disability. *Ann Lab Med* 2018;38(5):473-80. doi: 10.3343/alm.2018.38.5.473 [published Online First: 2018/05/26]

14. Lionel AC, Costain G, Monfared N, Walker S, Reuter MS, Hosseini SM, Thiruvahindrapuram B, Merico D, Jobling R, Nalpathamkalam T, Pellecchia G, Sung WWL, Wang Z, Bikangaga P, Boelman C, Carter MT, Cordeiro D, Cytrynbaum C, Dell SD, Dhir P, Dowling JJ, Heon E, Hewson S, Hiraki L, Inbar-Feigenberg M, Klatt R, Kronick J, Laxer RM, Licht C, MacDonald H, Mercimek-Andrews S, Mendoza-Londono R, Piscione T, Schneider R, Schulze A, Silverman E, Siriwardena K, Snead OC, Sondheimer N, Sutherland J, Vincent A, Wasserman JD, Weksberg R, Shuman C, Carew C, Szego MJ, Hayeems RZ, Basran R, Stavropoulos DJ, Ray PN, Bowdin S, Meyn MS, Cohn RD, Scherer SW, Marshall CR. Improved diagnostic yield compared with targeted gene sequencing panels suggests a role for whole-genome sequencing as a first-tier genetic test. *Genet Med* 2017 doi: 10.1038/gim.2017.119 [published Online First: 2017/08/05]

15. Meienberg J, Bruggmann R, Oexle K, Matyas G. Clinical sequencing: is WGS the better WES? *Hum Genet* 2016;135(3):359-62. doi: 10.1007/s00439-015-1631-9 [published Online First: 2016/01/09]

16. Miller NA, Farrow EG, Gibson M, Willig LK, Twist G, Yoo B, Marrs T, Corder S, Krivohlavek L, Walter A, Petrikin JE, Saunders CJ, Thiffault I, Soden SE, Smith LD, Dinwiddie DL, Herd S, Cakici JA, Catreux S, Ruehle M, Kingsmore SF. A 26-hour system of highly sensitive whole genome sequencing for emergency management of genetic diseases. *Genome Med* 2015;7:100. doi: 10.1186/s13073-015-0221-8 [published Online First: 2015/10/01]

17. Petrikin JE, Willig LK, Smith LD, Kingsmore SF. Rapid whole genome sequencing and precision neonatology. *Semin Perinatol* 2015;39(8):623-31. doi: 10.1053/j.semperi.2015.09.009 [published Online First: 2015/11/02]

18. Petrikin JE, Cakici JA, Clark MM, Willig LK, Sweeney NM, Farrow EG, Saunders CJ, Thiffault I, Miller NA, Zellmer L, Herd SM, Holmes AM, Batalov S, Veeraraghavan N, Smith LD, Dimmock DP, Leeder JS, Kingsmore SF. The NSIGHT1-randomized controlled trial: rapid whole-genome sequencing for accelerated etiologic diagnosis in critically ill infants. *NPJ Genom Med* 2018;3:6. doi: 10.1038/s41525-018-0045-8 [published Online First: 2018/02/17]

19. Retterer K, Juusola J, Cho MT, Vitazka P, Millan F, Gibellini F, Vertino-Bell A, Smaoui N, Neidich J, Monaghan KG, McKnight D, Bai R, Suchy S, Friedman B, Tahiliani J, Pineda-Alvarez D, Richard G, Brandt T, Haverfield E, Chung WK, Bale S. Clinical application of whole-exome sequencing across clinical indications. *Genet Med* 2016;18(7):696-704. doi: 10.1038/gim.2015.148 [published Online First: 2015/12/04]

20. Saunders CJ, Miller NA, Soden SE, Dinwiddie DL, Noll A, Alnadi NA, Andraws N, Patterson ML, Krivohlavek LA, Fellis J, Humphray S, Saffrey P, Kingsbury Z, Weir JC, Betley J, Grocock RJ, Margulies EH, Farrow EG, Artman M, Safina NP, Petrikin JE, Hall KP, Kingsmore SF. Rapid whole-genome sequencing for genetic disease diagnosis in neonatal intensive care units. *Sci Transl Med* 2012;4(154):154ra35. doi: 10.1126/scitranslmed.3004041 [published Online First: 2012/10/05]

21. Soden SE, Saunders CJ, Willig LK, Farrow EG, Smith LD, Petrikin JE, LePichon JB, Miller NA, Thiffault I, Dinwiddie DL, Twist G, Noll A, Heese BA, Zellmer L, Atherton AM, Abdelmoity AT, Safina N, Nyp SS, Zuccarelli B, Larson IA, Modrcin A, Herd S, Creed M, Ye Z, Yuan X, Brodsky RA, Kingsmore SF. Effectiveness of exome and genome sequencing guided by acuity of illness for diagnosis of neurodevelopmental disorders. *Sci Transl Med* 2014;6(265):265ra168. doi: 10.1126/scitranslmed.3010076 [published Online First: 2014/12/05]

22. Splinter K, Adams DR, Bacino CA, Bellen HJ, Bernstein JA, Cheatle-Jarvela AM, Eng CM, Esteves C, Gahl WA, Hamid R, Jacob HJ, Kikani B, Koeller DM, Kohane IS, Lee BH, Loscalzo J, Luo X, McCray AT, Metz TO, Mulvihill JJ, Nelson SF, Palmer CGS, Phillips JA, 3rd, Pick L, Postlethwait JH, Reuter C, Shashi V, Sweetser DA, Tifft CJ, Walley NM, Wangler MF, Westerfield M, Wheeler MT, Wise AL, Worthey EA, Yamamoto S, Ashley EA. Effect of Genetic Diagnosis on Patients with Previously Undiagnosed Disease. *N Engl J Med* 2018 doi: 10.1056/NEJMoa1714458 [published Online First: 2018/10/12]

23. Stark Z, Tan TY, Chong B, Brett GR, Yap P, Walsh M, Yeung A, Peters H, Mordaunt D, Cowie S, Amor DJ, Savarirayan R, McGillivray G, Downie L, Ekert PG, Theda C, James PA, Yaplito-Lee J, Ryan MM, Leventer RJ, Creed E, Macciocca I, Bell KM, Oshlack A, Sadedin S, Georgeson P, Anderson C, Thorne N, Melbourne Genomics Health A, Gaff C, White SM. A prospective evaluation of whole-exome sequencing as a first-tier molecular test in infants with suspected monogenic disorders. *Genet Med* 2016;18(11):1090-96. doi: 10.1038/gim.2016.1 [published Online First: 2016/11/01]

24. Stavropoulos DJ, Merico D, Jobling R, Bowdin S, Monfared N, Thiruvahindrapuram B, Nalpathamkalam T, Pellecchia G, Yuen RKC, Szego MJ, Hayeems RZ, Shaul RZ, Brudno M, Girdea M, Frey B, Alipanahi B, Ahmed S, Babul-Hirji R, Porras RB, Carter MT, Chad L, Chaudhry A, Chitayat D, Doust SJ, Cytrynbaum C, Dupuis L, Ejaz R, Fishman L, Guerin A, Hashemi B, Helal M, Hewson S, Inbar-Feigenberg M, Kannu P, Karp N, Kim R, Kronick J, Liston E, MacDonald H, Mercimek-Mahmutoglu S, Mendoza-Londono R, Nasr E, Nimmo G, Parkinson N, Quercia N, Raiman J, Roifman M, Schulze A, Shugar A, Shuman C, Sinajon P, Siriwardena K, Weksberg R, Yoon G, Carew C, Erickson R, Leach RA, Klein R, Ray PN, Meyn MS, Scherer SW, Cohn RD, Marshall CR. Whole Genome Sequencing Expands Diagnostic Utility and Improves Clinical Management in Pediatric Medicine. *NPJ Genom Med* 2016;1 doi: 10.1038/npjgenmed.2015.12 [published Online First: 2016/01/13]

25. Tammimies K, Marshall CR, Walker S, Kaur G, Thiruvahindrapuram B, Lionel AC, Yuen RK, Uddin M, Roberts W, Weksberg R, Woodbury-Smith M, Zwaigenbaum L, Anagnostou E, Wang Z, Wei J, Howe JL, Gazzellone MJ, Lau L, Sung WW, Whitten K, Vardy C, Crosbie V, Tsang B, D'Abate L, Tong WW, Luscombe S, Doyle T, Carter MT, Szatmari P, Stuckless S, Merico D, Stavropoulos DJ, Scherer SW, Fernandez BA. Molecular Diagnostic Yield of Chromosomal Microarray Analysis and Whole-Exome Sequencing in Children With Autism Spectrum Disorder. *Jama* 2015;314(9):895-903. doi: 10.1001/jama.2015.10078 [published Online First: 2015/09/02]

26. Tan TY, Dillon OJ, Stark Z, Schofield D, Alam K, Shrestha R, Chong B, Phelan D, Brett GR, Creed E, Jarmolowicz A, Yap P, Walsh M, Downie L, Amor DJ, Savarirayan R, McGillivray G, Yeung A, Peters H, Robertson SJ, Robinson AJ, Macciocca I, Sadedin S, Bell K, Oshlack A, Georgeson P, Thorne N, Gaff C, White SM. Diagnostic Impact and Cost-effectiveness of Whole-Exome Sequencing for Ambulant Children With Suspected Monogenic Conditions. *JAMA Pediatr* 2017;171(9):855-62. doi: 10.1001/jamapediatrics.2017.1755 [published Online First: 2017/08/02]

27. Tarailo-Graovac M, Shyr C, Ross CJ, Horvath GA, Salvarinova R, Ye XC, Zhang LH, Bhavsar AP, Lee JJ, Drogemoller BI, Abdelsayed M, Alfadhel M, Armstrong L, Baumgartner MR, Burda P, Connolly MB, Cameron J, Demos M, Dewan T, Dionne J, Evans AM, Friedman JM, Garber I, Lewis S, Ling J, Mandal R, Mattman A, McKinnon M, Michoulas A, Metzger D, Ogunbayo OA, Rakic B, Rozmus J, Ruben P, Sayson B, Santra S, Schultz KR, Selby K, Shekel P, Sirrs S, Skrypnyk C, Superti-Furga A, Turvey SE, Van Allen MI, Wishart D, Wu J, Wu J, Zafeiriou D, Kluijtmans L, Wevers RA, Eydoux P, Lehman AM, Vallance H, Stockler-Ipsiroglu S, Sinclair G, Wasserman WW, van Karnebeek CD. Exome Sequencing and the Management of Neurometabolic Disorders. *N Engl J Med* 2016;374(23):2246-55. doi: 10.1056/NEJMoa1515792 [published Online First: 2016/06/09]

28. Taylor JC, Martin HC, Lise S, Broxholme J, Cazier JB, Rimmer A, Kanapin A, Lunter G, Fiddy S, Allan C, Aricescu AR, Attar M, Babbs C, Becq J, Beeson D, Bento C, Bignell P, Blair E, Buckle VJ, Bull K, Cais O, Cario H, Chapel H, Copley RR, Cornall R, Craft J, Dahan K, Davenport EE, Dendrou C, Devuyst O, Fenwick AL, Flint J, Fugger L, Gilbert RD, Goriely A, Green A, Greger IH, Grocock R, Gruszczyk AV, Hastings R, Hatton E, Higgs D, Hill A, Holmes C, Howard M, Hughes L, Humburg P, Johnson D, Karpe F, Kingsbury Z, Kini U, Knight JC, Krohn J, Lamble S, Langman C, Lonie L, Luck J, McCarthy D, McGowan SJ, McMullin MF, Miller KA, Murray L, Nemeth AH, Nesbit MA, Nutt D, Ormondroyd E, Oturai AB, Pagnamenta A, Patel SY, Percy M, Petousi N, Piazza P, Piret SE, Polanco-Echeverry G, Popitsch N, Powrie F, Pugh C, Quek L, Robbins PA, Robson K, Russo A, Sahgal N, van Schouwenburg PA, Schuh A, Silverman E, Simmons A, Sorensen PS, Sweeney E, Taylor J, Thakker RV, Tomlinson I, Trebes A, Twigg SR, Uhlig HH, Vyas P, Vyse T, Wall SA, Watkins H, Whyte MP, Witty L, Wright B, Yau C, Buck D, Humphray S, Ratcliffe PJ, Bell JI, Wilkie AO, Bentley D, Donnelly P, McVean G. Factors influencing success of clinical genome sequencing across a broad spectrum of disorders. *Nat Genet* 2015;47(7):717-26. doi: 10.1038/ng.3304 [published Online First: 2015/05/20]

29. Theunissen TEJ, Nguyen M, Kamps R, Hendrickx AT, Sallevelt S, Gottschalk RWH, Calis CM, Stassen APM, de Koning B, Mulder-Den Hartog ENM, Schoonderwoerd K, Fuchs SA, Hilhorst-Hofstee Y, de Visser M, Vanoevelen J, Szklarczyk R, Gerards M, de Coo IFM, Hellebrekers D, Smeets HJM. Whole Exome Sequencing Is the Preferred Strategy to Identify the Genetic Defect in Patients With a Probable or Possible Mitochondrial Cause. *Front Genet* 2018;9:400. doi: 10.3389/fgene.2018.00400 [published Online First: 2018/10/30]

30. Thevenon J, Duffourd Y, Masurel-Paulet A, Lefebvre M, Feillet F, El Chehadeh-Djebbar S, St-Onge J, Steinmetz A, Huet F, Chouchane M, Darmency-Stamboul V, Callier P, Thauvin-Robinet C, Faivre L, Riviere JB. Diagnostic odyssey in severe neurodevelopmental disorders: toward clinical whole-exome sequencing as a first-line diagnostic test. *Clin Genet* 2016;89(6):700-7. doi: 10.1111/cge.12732 [published Online First: 2016/01/13]

31. Tsiplova K, Zur RM, Marshall CR, Stavropoulos DJ, Pereira SL, Merico D, Young EJ, Sung WWL, Scherer SW, Ungar WJ. A microcosting and cost-consequence analysis of clinical genomic testing strategies in autism spectrum disorder. *Genet Med* 2017 doi: 10.1038/gim.2017.47 [published Online First: 2017/05/05]

32. van Diemen CC, Kerstjens-Frederikse WS, Bergman KA, de Koning TJ, Sikkema-Raddatz B, van der Velde JK, Abbott KM, Herkert JC, Lohner K, Rump P, Meems-Veldhuis MT, Neerincx PBT, Jongbloed JDH, van Ravenswaaij-Arts CM, Swertz MA, Sinke RJ, van Langen IM, Wijmenga C. Rapid Targeted Genomics in Critically Ill Newborns. *Pediatrics* 2017;140(4) doi: 10.1542/peds.2016-2854 [published Online First: 2017/09/25]

33. Vissers L, van Nimwegen KJM, Schieving JH, Kamsteeg EJ, Kleefstra T, Yntema HG, Pfundt R, van der Wilt GJ, Krabbenborg L, Brunner HG, van der Burg S, Grutters J, Veltman JA, Willemsen M. A clinical utility study of exome sequencing versus conventional genetic testing in pediatric neurology. *Genet Med* 2017;19(9):1055-63. doi: 10.1038/gim.2017.1 [published Online First: 2017/03/24]

34. Willig LK, Petrikin JE, Smith LD, Saunders CJ, Thiffault I, Miller NA, Soden SE, Cakici JA, Herd SM, Twist G, Noll A, Creed M, Alba PM, Carpenter SL, Clements MA, Fischer RT, Hays JA, Kilbride H, McDonough RJ, Rosterman JL, Tsai SL, Zellmer L, Farrow EG, Kingsmore SF. Whole-genome sequencing for identification of Mendelian disorders in critically ill infants: a retrospective analysis of diagnostic and clinical findings. *Lancet Respir Med* 2015;3(5):377-87. doi: 10.1016/s2213-2600(15)00139-3 [published Online First: 2015/05/06]

35. Wright CF, Fitzgerald TW, Jones WD, Clayton S, McRae JF, van Kogelenberg M, King DA, Ambridge K, Barrett DM, Bayzetinova T, Bevan AP, Bragin E, Chatzimichali EA, Gribble S, Jones P, Krishnappa N, Mason LE, Miller R, Morley KI, Parthiban V, Prigmore E, Rajan D, Sifrim A, Swaminathan GJ, Tivey AR, Middleton A, Parker M, Carter NP, Barrett JC, Hurles ME, FitzPatrick DR, Firth HV. Genetic diagnosis of developmental disorders in the DDD study: a scalable analysis of genome-wide research data. *Lancet* 2015;385(9975):1305-14. doi: 10.1016/s0140-6736(14)61705-0 [published Online First: 2014/12/23]

36. Wright CF, FitzPatrick DR, Firth HV. Paediatric genomics: diagnosing rare disease in children. *Nat Rev Genet* 2018;19(5):253-68. doi: 10.1038/nrg.2017.116 [published Online First: 2018/02/06]
